# Supplementary material for: Ameliorating effects of Hericium erinaceus polysaccharides on intestinal barrier injury in immunocompromised mice induced by cyclophosphamide
Source: Royal Society of Chemistry journal article supplement (doi:10.1039/d2fo03769f), 2023-01-01
Supplement: d2fo03769f1.pdf [file d2fo03769f1.pdf]

**Table S1.** Primer sequences used for real time quantitative PCR

| Gene          | Forward Primer (5'-3') | Reverse Primer (5'-3')  |
|---------------|------------------------|-------------------------|
| GAPDH         | TCAAGAAGGTGGTGAAGCAG   | AAGGTGGAAGAGTGGGAGTTG   |
| Reg3 $\gamma$ | ATGCTTCCCCGTATAACCATCA | GGCCATATCTGCATCATACCAG  |
| ZO-1          | GCTTTAGCGAACAGAAGGAGC  | TTCATTTTTCCGAGACTTCACCA |
| MUC2          | ATGCCACCTCCTCAAAGAC    | GTAGTTTCCGTTGGAACAGTGAA |
| Claudin-1     | CTTCTCTGGGATGGATCG     | GGGTTGCCTGCAAAGTACTGT   |
| Occuldin      | TGAAAGTCCACCTCCTTACAGA | CCGGATAAAAAGAGTACGCTGG  |

**Table S2.** Spleen index and thymus index of mice

| Group  | spleen index           | thymus index           |
|--------|------------------------|------------------------|
| NC     | 3.04±0.21 <sup>a</sup> | 1.23±0.04 <sup>d</sup> |
| MC     | 4.32±0.37 <sup>c</sup> | 0.66±0.02 <sup>a</sup> |
| PC     | 3.67±0.43 <sup>b</sup> | 0.95±0.02 <sup>b</sup> |
| HEP50H | 3.58±0.39 <sup>b</sup> | 1.14±0.03 <sup>c</sup> |
| HEP50M | 3.63±0.45 <sup>b</sup> | 0.78±0.01 <sup>b</sup> |
| HEP50L | 3.81±0.58 <sup>b</sup> | 0.81±0.03 <sup>b</sup> |

Columns with no letter in common are significantly different between the two treatment groups ( $P < 0.05$ ).
